# Supplementary material
Source: PubMed Central journal article supplement (PMC3686109)
Supplement: ac400746j_si_001.pdf [file ac400746j_si_001.pdf]

Supplementary material for:

### Optimized Light-Directed Synthesis of Aptamer Microarrays

Nicole L.W. Franssen-van Hal, Pepijn van der Putte, Klaus Hellmuth, Stefan Matysiak, Nicole Kretschy,  
Mark M. Somoza

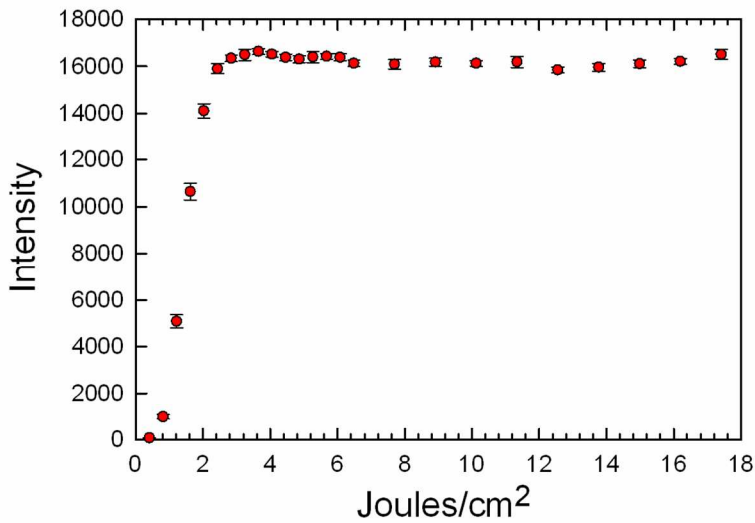

**Figure S1.** Normalized hybridization fluorescent signals for a single 60mer sequence synthesized with a photodeprotection light exposure gradient between 0.2 and 18 J/cm<sup>2</sup>. Sequence on microarray: GTT AAG CGA AGA AGA AAG TAG CGT GGC GCA CAG TTG CCC AAT CAA TTA CAC CCT CAT TTC.

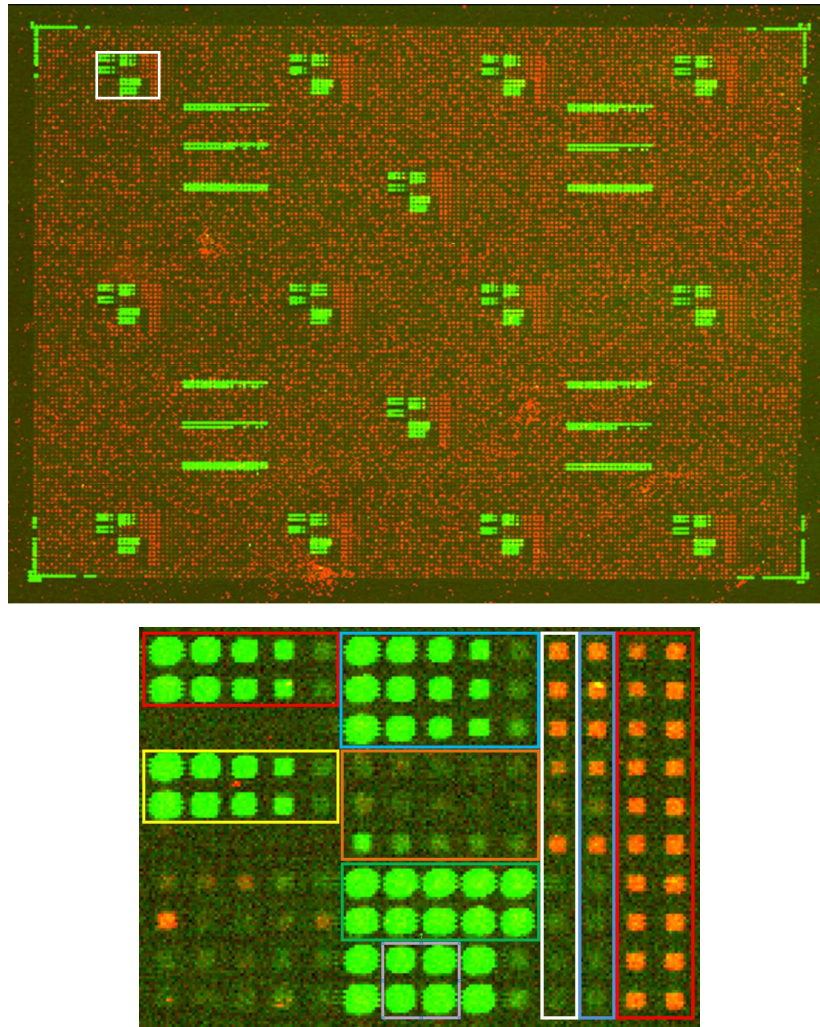

**Figure S2.** Overview of the array layout. **Top.** The full array contains 14 small QC-blocks (white square). All sequences outside the QC-blocks are for the aptamer binding assays. **Bottom.** Enlarged picture of one of the 14 small QC-blocks. **Cy3-labeled QC oligo hybridization:** Spots in the **blue** rectangle are QC1-5 (row 1), QC6-10 (row 2) and QC11-15 (row 3). The **orange** rectangles contain 15 negative control spots. The **red** rectangle contains spots on top of a 5T-spacer for QC1-5 (row 1) and QC6-10 (row 2). The **yellow** rectangle contains spots on top of a 10T-spacer for QC1-5 (row 1) and QC6-10 (row 2). The **green** rectangle contains spots for a coupling efficiency test. Two hybridization sequences were synthesized: QC1 (top row) and QC6 (bottom row). These were synthesized on mixed-base linkers with sequence ACGTACGT... with lengths increasing in steps of five from a 5mer to a 25mer. The **purple** square indicates the spots for the coupling efficiency test of the four separate amidites. QC6 on a dA 5mer (spot 1, row 1), QC6 on a dC 5mer (spot 2, row 1), QC6 on a dG 5mer (spot 1, row 2), QC6 on a dT 5mer (spot 2, row 2). A step capping followed each coupling in the linker synthesis. Other spots in this block are not relevant in this experiment. **Cy5-labeled streptavidin binding to aptamers:** In the white area from top to bottom sequences SBA001-SBA010. In the **blue** area from top to bottom: sequences SBA013-SBA022. In

the **blue** area from top to bottom: sequences SBA013-SBA022. In the **red** area from upper left to lower left, sequences SBA025-SBA034 and on the right, SBA037-SBA046. Aptamer sequences are given on the next page.

| no     | name           | 5' to 3'                                             | nt |
|--------|----------------|------------------------------------------------------|----|
| SBA001 | St-2-1_T10     | ATTGACCGCTGTGTGACGCAAACTCAATTTTTTTTTTTT              | 39 |
| SBA002 | St-2-A_T10     | GCATTGACCGCTGTGTGACGCAAACTCAATGCTTTTTTTTTT           | 43 |
| SBA003 | St-2-T-1_T10   | TTGACCGCTGTGTGACGCAAACTCAATTTTTTTTTTTT               | 37 |
| SBA004 | St-2-T-2_T10   | TGACCGCTGTGTGACGCAAACTCATTTTTTTTTTTTT                | 35 |
| SBA005 | St-2-T-3_T10   | GACCGCTGTGTGACGCAAACTCTTTTTTTTTTTT                   | 33 |
| SBA006 | St-2-R-1_T10   | ATTGACGCGTGTGACGCAAACTCAATTTTTTTTTTTT                | 37 |
| SBA007 | St-2-R-2_T10   | ATTGAGTGTGACGCAAACTCAATTTTTTTTTTTT                   | 34 |
| SBA008 | St-2-M-1_T10   | ATTGACCTCTGTGTGACGCAAACTCAATTTTTTTTTTTT              | 39 |
| SBA009 | St-2-M-2_T10   | ATTGACCGCTGTGTGACTCAAACTCAATTTTTTTTTTTT              | 39 |
| SBA010 | St-2-M-3_T10   | ATTGACCGCTGTGTAACGCAAACTCAATTTTTTTTTTTT              | 39 |
| SBA011 | St-D-1_T10     | GGGGGCCGCTCCCCGACGAGGGGCCCTTTTTTTTTTTT               | 39 |
| SBA012 | St-2-1_rev_T10 | TAACTCACAACGCAGTGTGTCGCCAGTTATTTTTTTTTTTT            | 39 |
| SBA013 | St-2-1_T20     | ATTGACCGCTGTGTGACGCAAACTCAATTTTTTTTTTTTTTTTTTTT      | 49 |
| SBA014 | St-2-A_T20     | GCATTGACCGCTGTGTGACGCAAACTCAATGCTTTTTTTTTTTTTTTTTTTT | 53 |
| SBA015 | St-2-T-1_T20   | TTGACCGCTGTGTGACGCAAACTCAATTTTTTTTTTTTTTTTTTTT       | 47 |
| SBA016 | St-2-T-2_T20   | TGACCGCTGTGTGACGCAAACTCATTTTTTTTTTTTTTTTTTTTT        | 45 |
| SBA017 | St-2-T-3_T20   | GACCGCTGTGTGACGCAAACTCTTTTTTTTTTTTTTTTTTTT           | 43 |
| SBA018 | St-2-R-1_T20   | ATTGACGCGTGTGACGCAAACTCAATTTTTTTTTTTTTTTTTTTT        | 47 |
| SBA019 | St-2-R-2_T20   | ATTGAGTGTGACGCAAACTCAATTTTTTTTTTTTTTTTTTTT           | 44 |
| SBA020 | St-2-M-1_T20   | ATTGACCTCTGTGTGACGCAAACTCAATTTTTTTTTTTTTTTTTTTT      | 49 |
| SBA021 | St-2-M-2_T20   | ATTGACCGCTGTGTGACTCAAACTCAATTTTTTTTTTTTTTTTTTTT      | 49 |
| SBA022 | St-2-M-3_T20   | ATTGACCGCTGTGTAACGCAAACTCAATTTTTTTTTTTTTTTTTTTT      | 49 |
| SBA023 | St-D-1_T20     | GGGGGCCGCTCCCCGACGAGGGGCCCTTTTTTTTTTTTTTTTTTTT       | 49 |
| SBA024 | St-2-1_rev_T20 | TAACTCACAACGCAGTGTGTCGCCAGTTATTTTTTTTTTTTTTTTTTTT    | 49 |
| SBA025 | St-2-1_T00     | ATTGACCGCTGTGTGACGCAAACTCAAT                         | 29 |
| SBA026 | St-2-1_T01     | ATTGACCGCTGTGTGACGCAAACTCAATT                        | 30 |
| SBA027 | St-2-1_T02     | ATTGACCGCTGTGTGACGCAAACTCAATTT                       | 31 |
| SBA028 | St-2-1_T03     | ATTGACCGCTGTGTGACGCAAACTCAATTTT                      | 32 |
| SBA029 | St-2-1_T04     | ATTGACCGCTGTGTGACGCAAACTCAATTTTT                     | 33 |
| SBA030 | St-2-1_T05     | ATTGACCGCTGTGTGACGCAAACTCAATTTTTT                    | 34 |
| SBA031 | St-2-1_T06     | ATTGACCGCTGTGTGACGCAAACTCAATTTTTTT                   | 35 |
| SBA032 | St-2-1_T07     | ATTGACCGCTGTGTGACGCAAACTCAATTTTTTTT                  | 36 |
| SBA033 | St-2-1_T08     | ATTGACCGCTGTGTGACGCAAACTCAATTTTTTTTT                 | 37 |
| SBA034 | St-2-1_T09     | ATTGACCGCTGTGTGACGCAAACTCAATTTTTTTTTT                | 38 |
| SBA035 | St-2-1_T10     | ATTGACCGCTGTGTGACGCAAACTCAATTTTTTTTTTT               | 39 |
| SBA036 | St-2-1_T11     | ATTGACCGCTGTGTGACGCAAACTCAATTTTTTTTTTTT              | 40 |
| SBA037 | St-2-1_T12     | ATTGACCGCTGTGTGACGCAAACTCAATTTTTTTTTTTTT             | 41 |
| SBA038 | St-2-1_T13     | ATTGACCGCTGTGTGACGCAAACTCAATTTTTTTTTTTTTT            | 42 |
| SBA039 | St-2-1_T14     | ATTGACCGCTGTGTGACGCAAACTCAATTTTTTTTTTTTTTT           | 43 |
| SBA040 | St-2-1_T15     | ATTGACCGCTGTGTGACGCAAACTCAATTTTTTTTTTTTTTTT          | 44 |
| SBA041 | St-2-1_T16     | ATTGACCGCTGTGTGACGCAAACTCAATTTTTTTTTTTTTTTTT         | 45 |
| SBA042 | St-2-1_T17     | ATTGACCGCTGTGTGACGCAAACTCAATTTTTTTTTTTTTTTTTT        | 46 |
| SBA043 | St-2-1_T18     | ATTGACCGCTGTGTGACGCAAACTCAATTTTTTTTTTTTTTTTTTT       | 47 |
| SBA044 | St-2-1_T19     | ATTGACCGCTGTGTGACGCAAACTCAATTTTTTTTTTTTTTTTTTTT      | 48 |
| SBA045 | St-2-1_T20     | ATTGACCGCTGTGTGACGCAAACTCAATTTTTTTTTTTTTTTTTTTT      | 49 |
| SBA046 | St-2-1_T21     | ATTGACCGCTGTGTGACGCAAACTCAATTTTTTTTTTTTTTTTTTTT      | 50 |
| SBA047 | St-2-1_T22     | ATTGACCGCTGTGTGACGCAAACTCAATTTTTTTTTTTTTTTTTTTT      | 51 |
| SBA048 | St-2-1_T23     | ATTGACCGCTGTGTGACGCAAACTCAATTTTTTTTTTTTTTTTTTTT      | 52 |
